# Supplementary material for: Boron-doping-induced defect engineering enables high performance of a graphene cathode for aluminum batteries
Source: Royal Society of Chemistry journal article supplement (doi:10.1039/d1qi01474a), 2022-01-01
Supplement: d1qi01474a1.pdf [file d1qi01474a1.pdf]

## **Supporting Information**

# **Boron-doping-induced Defect Engineering Enables High-performance Graphene Cathode for Aluminum Batteries**

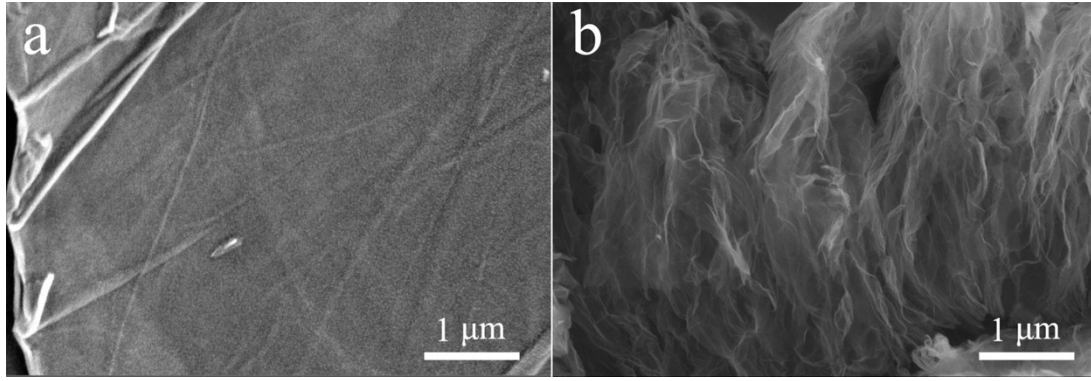

**Fig. S1.** The SEM images for (a) rGO and (b) BG samples.

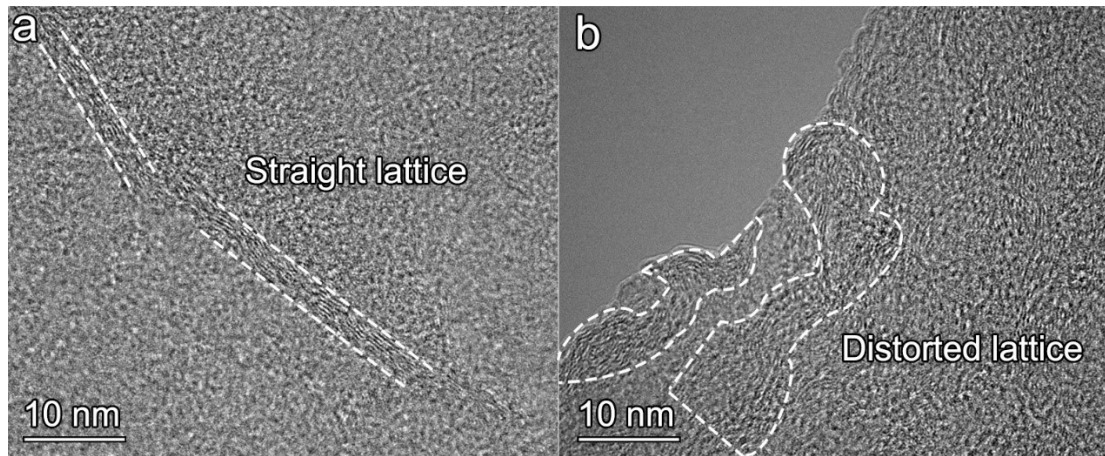

**Fig. S2.** The HRTEM images for (a) rGO and (b) BG samples.

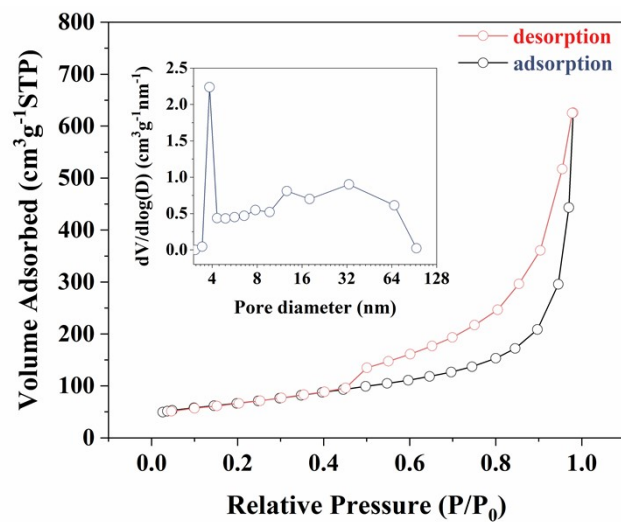

**Fig. S3.** The  $\text{N}_2$  adsorption-desorption isotherms and the pore-size distributions (inset) for rGO sample.

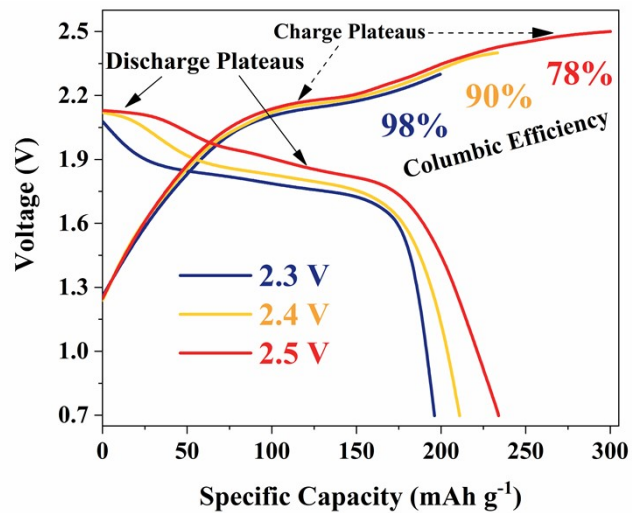

**Fig. S4.** The charge and discharge curves for the BG cathode upon cut-off voltages of 2.3 V, 2.4 V, and 2.5 V at 1 A g<sup>-1</sup>.

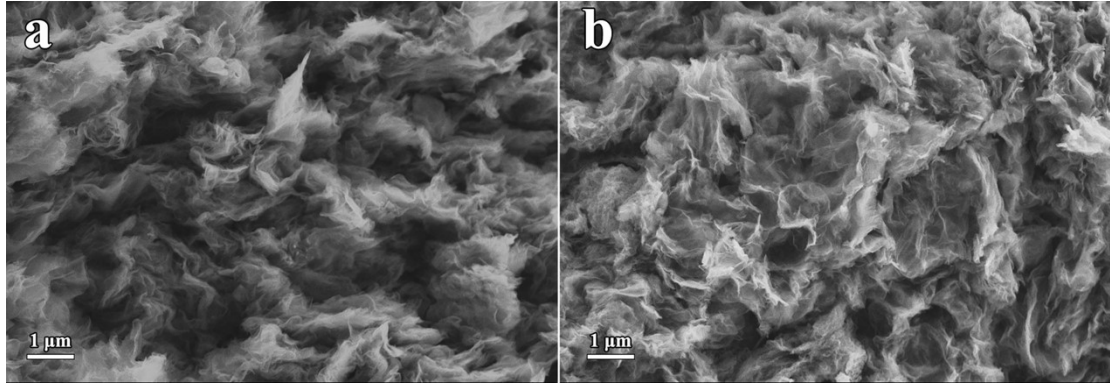

**Fig. S5.** The SEM images for the BG sample (a) before cycling and (b) after 100 cycles.

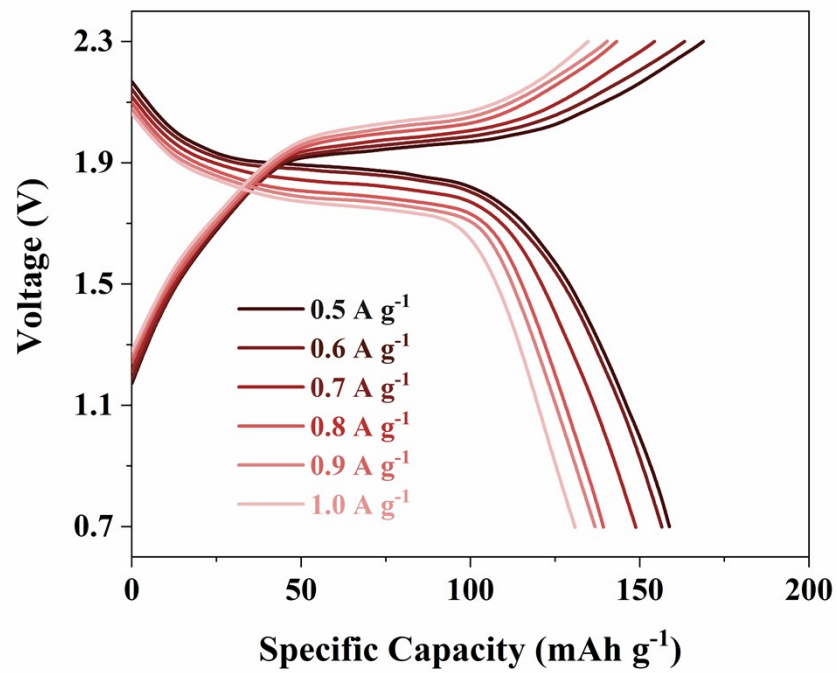

**Fig. S6.** The charge and discharge curves for the rGO cathode at different current densities.

**Table S1.** The comparison of the electrochemical performance between BG and other cathodes for RABs.

| Cathode materials                                                                              | Charge/discharge voltage (vs. Al) | Cycling performance                                                                                                  | Ref.      |
|------------------------------------------------------------------------------------------------|-----------------------------------|----------------------------------------------------------------------------------------------------------------------|-----------|
| BG                                                                                             | 2.0 V/1.8 V                       | 0.5 A g <sup>-1</sup> /100 cycle/227 mAh g <sup>-1</sup><br>5 A g <sup>-1</sup> /10000 cycle/135 mAh g <sup>-1</sup> | This work |
| SnSe                                                                                           | 2.0 V/1.6 V                       | 0.3 A g <sup>-1</sup> /100 cycle/107 mAh/g                                                                           | 1         |
| VS <sub>4</sub>                                                                                | 1.3 V/0.7 V                       | 0.4 A g <sup>-1</sup> /120 cycles/197 mAh g <sup>-1</sup>                                                            | 2         |
| Expanded Graphite                                                                              | 2.1 V/2.0 V                       | 2 A g <sup>-1</sup> /300 cycles/111 mAh g <sup>-1</sup>                                                              | 3         |
| Ti <sub>0.95</sub> □ <sub>0.05</sub> O <sub>1.79</sub> Cl <sub>0.08</sub> (OH) <sub>0.13</sub> | 1.2 V/1.0 V                       | 3 A g <sup>-1</sup> /110 cycles/64 mAh g <sup>-1</sup>                                                               | 4         |
| Macrocyclic calix[4]quinone                                                                    | 1.0 V/ 0.8 V                      | 0.2 A g <sup>-1</sup> /50 cycles/269 mAh g <sup>-1</sup>                                                             | 5         |
| CoS <sub>1.097</sub>                                                                           | 1.5 V /0.7 V                      | 0.1 A g <sup>-1</sup> /500 cycles/80 mAh g <sup>-1</sup>                                                             | 6         |
| Tetrachloro-1,4-benzoquinone                                                                   | 1.4 V /1.1 V                      | 2 A g <sup>-1</sup> /200 cycles/104 mAh g <sup>-1</sup>                                                              | 7         |
| K <sub>2</sub> CuFe(CN) <sub>6</sub>                                                           | 1.0 V/0.8 V                       | 0.5 A g <sup>-1</sup> /100 cycles/48 mAh g <sup>-1</sup>                                                             | 8         |
| Surface-perforated graphene                                                                    | 2.0 V/1.8 V                       | 2 A g <sup>-1</sup> /200 cycles/197 mAh g <sup>-1</sup>                                                              | 9         |
| N-doped C@ZnSe                                                                                 | 2.1 V/1.8 V                       | 1.5 A g <sup>-1</sup> /500 cycles/61 mAh g <sup>-1</sup>                                                             | 10        |
| Graphite flakes@carbon fiber                                                                   | 2.0 V/1.8 V                       | 3 A g <sup>-1</sup> /300 cycles/60 mAh g <sup>-1</sup>                                                               | 11        |
| Graphite Nanoflakes                                                                            | 2.0 V/1.8 V                       | 1 A g <sup>-1</sup> /1000 cycles/100 mAh g <sup>-1</sup>                                                             | 12        |
| Unzipped carbon nanotubes                                                                      | 2.0 V/1.8 V                       | 5 A g <sup>-1</sup> /5600 cycles/75 mAh g <sup>-1</sup>                                                              | 13        |
| Graphene                                                                                       | 2.3 V/2.2 V                       | 3 A g <sup>-1</sup> /1000 cycles/75 mAh g <sup>-1</sup>                                                              | 14        |
| Carbon@graphene                                                                                | 1.9 V/1.8 V                       | 4 A g <sup>-1</sup> /10000 cycles/98 mAh g <sup>-1</sup>                                                             | 15        |
| Graphitic foam                                                                                 | 2.1 V/1.9 V                       | 4 A g <sup>-1</sup> /7500 cycles/70 mAh g <sup>-1</sup>                                                              | 16        |
| SnS <sub>2</sub>                                                                               | 1.6 V/0.7 V                       | 0.2 A g <sup>-1</sup> /100 cycles/70 mAh g <sup>-1</sup>                                                             | 17        |
| C@N-C@N,P-C                                                                                    | 1.3 V/0.5 V                       | 5 A g <sup>-1</sup> /2500 cycles/98 mAh g <sup>-1</sup>                                                              | 18        |
| CoSe <sub>2</sub> /C-ND@rGO                                                                    | 1.8 V/0.9 V                       | 1 A g <sup>-1</sup> /500 cycles/143 mAh g <sup>-1</sup>                                                              | 19        |
| Co <sub>3</sub> (PO <sub>4</sub> ) <sub>2</sub> @C                                             | 1.2 V/1.3 V                       | 2 A g <sup>-1</sup> /500 cycles/151 mAh g <sup>-1</sup>                                                              | 20        |
| Co <sub>3</sub> S <sub>4</sub>                                                                 | 0.9 V/0.7 V                       | 0.05 A g <sup>-1</sup> /150 cycles/90 mAh g <sup>-1</sup>                                                            | 21        |
| CoSe                                                                                           | 1.9 V/ 1.9 V                      | 5 A g <sup>-1</sup> /100 cycles/63 mAh g <sup>-1</sup>                                                               | 22        |
| CuO                                                                                            | 0.8 V/0.6 V                       | 0.2 A g <sup>-1</sup> /100 cycles/113 mAh g <sup>-1</sup>                                                            | 23        |
| Ni <sub>3</sub> S <sub>2</sub> @Graphene                                                       | 1.5 V/1.0 V                       | 0.2 A g <sup>-1</sup> /300 cycle/50 mAh g <sup>-1</sup>                                                              | 24        |
| CuS@C                                                                                          | 1.9 V/1.0 V                       | 0.02 A g <sup>-1</sup> /100 cycle/90 mAh g <sup>-1</sup>                                                             | 25        |
| NiCo-sulfide                                                                                   | 2.0 V/1.6 V                       | 1 A g <sup>-1</sup> /100 cycle/83 mAh g <sup>-1</sup>                                                                | 26        |
| Cu <sub>3</sub> P/C                                                                            | 1.0 V/0.8 V                       | 0.05 A g <sup>-1</sup> /50 cycle/147 mAh g <sup>-1</sup>                                                             | 27        |
| V <sub>2</sub> CT <sub>x</sub> MXene                                                           | 1.4 V/1.0 V                       | 0.1 A g <sup>-1</sup> /100 cycle/90 mAh g <sup>-1</sup>                                                              | 28        |
| Co-P/CC                                                                                        | 1.0 V/0.8 V                       | 0.2 A g <sup>-1</sup> /400 cycle/85 mAh g <sup>-1</sup>                                                              | 29        |
| VS <sub>4</sub> /rGO                                                                           | 1.6 V/1.0 V                       | 0.2 A g <sup>-1</sup> /100 cycle/70 mAh g <sup>-1</sup>                                                              | 30        |



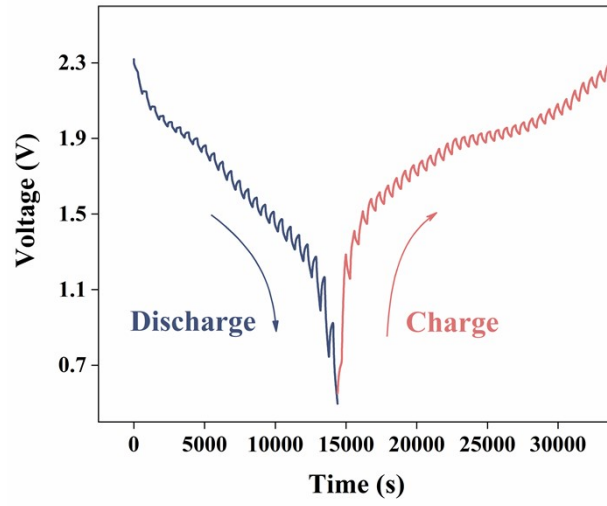

**Fig. S7.** The GITT curve for the rGO cathode.

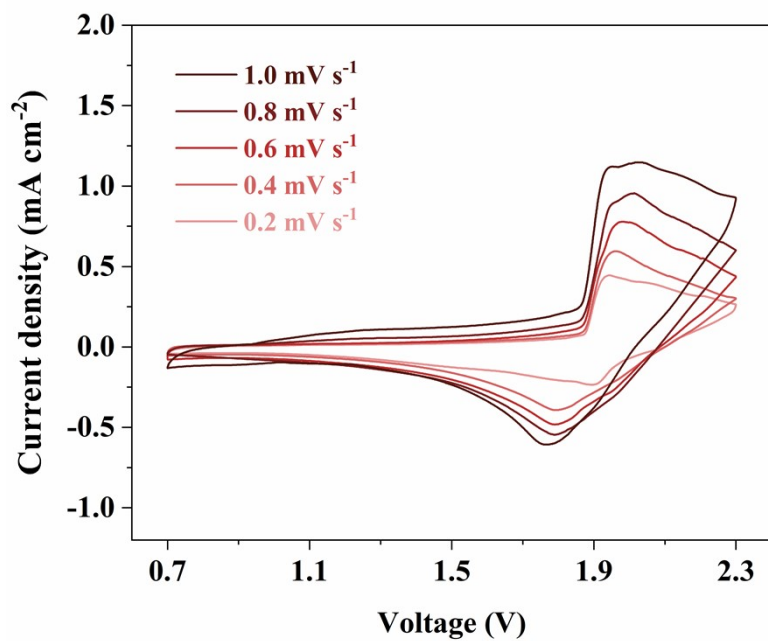

**Fig. S8.** The CV curves for the rGO cathode at different scan rates.

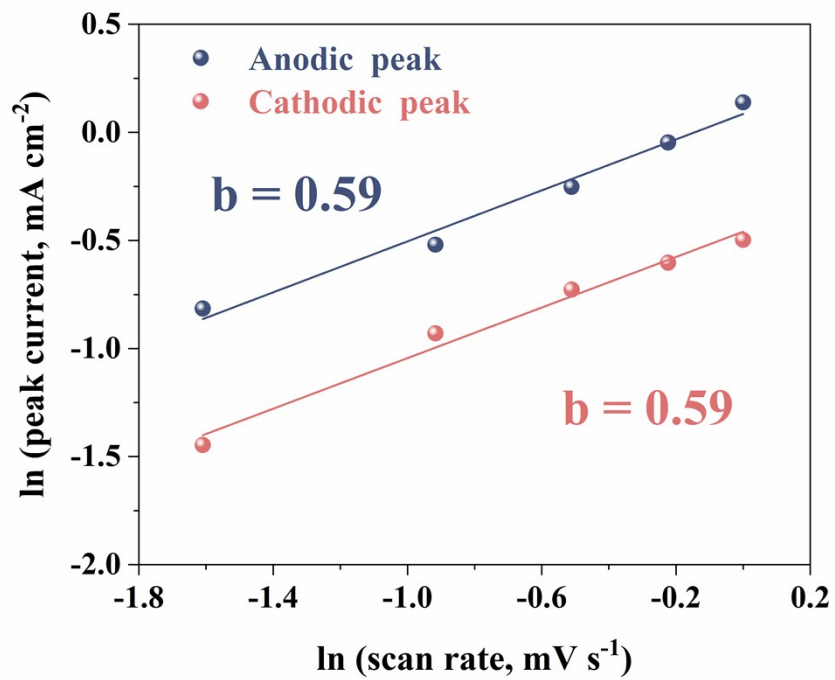

Fig. S9. The plot of  $\ln(i)$  versus  $\ln(v)$  for the rGO electrode.

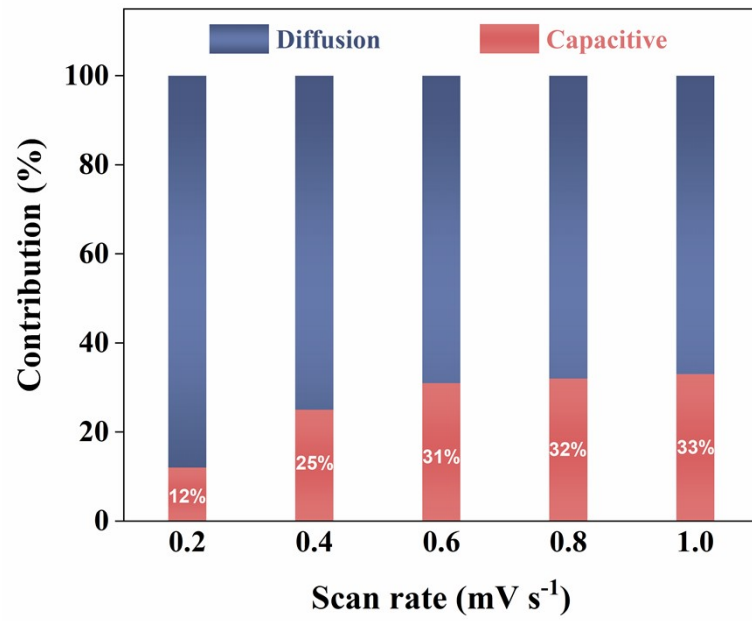

**Fig. S10.** The percentage of capacitive contribution for the rGO electrode upon different scan rates.

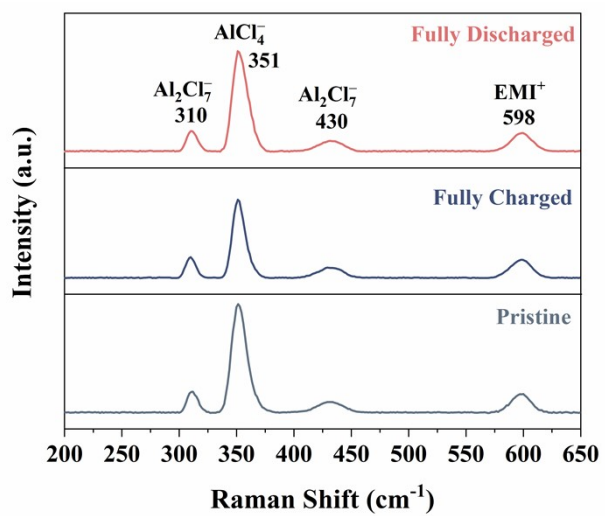

**Fig. S11.** The ex-situ Raman spectra for AlCl<sub>3</sub>/[EMIm]Cl ionic liquid on the BG cathode surface.

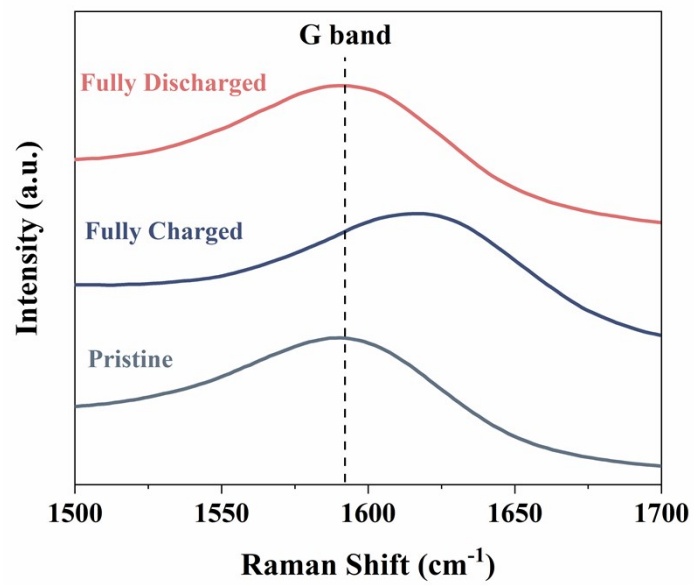

**Fig. S12.** The Raman spectra for the rGO cathode upon diverse states.

## References

1. Y. Zhang, B. Zhang, J. Li, J. Liu, X. Huo and F. Kang, SnSe nano-particles as advanced positive electrode materials for rechargeable aluminum-ion batteries, *Chemical Engineering Journal*, 2021, **403**, 126377.
2. L. Xing, K. A. Owusu, X. Liu, J. Meng, K. Wang, Q. An and L. Mai, Insights into the storage mechanism of VS<sub>4</sub> nanowire clusters in aluminum-ion battery, *Nano Energy*, 2021, **79**, 105384.
3. S. Guo, H. Yang, M. Liu, X. Feng, Y. Gao, Y. Bai and C. Wu, Al-Storage Behaviors of Expanded Graphite as High-Rate and Long-Life Cathode Materials for Rechargeable Aluminum Batteries, *ACS Applied Materials & Interfaces*, 2021, **13**, 22549-22558.
4. X. Wu, N. Qin, F. Wang, Z. Li, J. Qin, G. Huang, D. Wang, P. Liu, Q. Yao, Z. Lu and J. Deng, Reversible aluminum ion storage mechanism in Ti-deficient rutile titanium dioxide anode for aqueous aluminum-ion batteries, *Energy Storage Materials*, 2021, **37**, 619-627.
5. Y. Li, L. Liu, Y. Lu, R. Shi, Y. Ma, Z. Yan, K. Zhang and J. Chen, High-Energy-Density Quinone-Based Electrodes with [Al(OTF)]<sup>2+</sup> Storage Mechanism for Rechargeable Aqueous Aluminum Batteries, *Advanced Functional Materials*, 2021, **31**, 2102063.
6. R. Zhuang, G. Miao, Z. Huang, Q. Zhang, J.-C. Wu and J. Yang, Non-stoichiometric CoS<sub>1.097</sub> nanoparticles prepared from CoAl-layered double hydroxide and MOF template as cathode materials for aluminum-ion batteries, *Journal of Energy Chemistry*, 2021, **54**, 639-643.
7. J. He, X. Shi, C. Wang, H. Zhang, X. Liu, Z. Yang and X. Lu, A quinone electrode with reversible phase conversion for long-life rechargeable aqueous aluminum–metal batteries, *Chemical Communications*, 2021, DOI: 10.1039/D1CC02024B.
8. L. Yan, X. Zeng, S. Zhao, W. Jiang, Z. Li, X. Gao, T. Liu, Z. Ji, T. Ma, M. Ling and C. Liang, 9,10-Anthraquinone/K<sub>2</sub>CuFe(CN)<sub>6</sub>: A Highly Compatible Aqueous Aluminum-Ion Full-Battery Configuration, *ACS Applied Materials & Interfaces*, 2021, **13**, 8353-8360.
9. Y. Kong, C. Tang, X. Huang, A. K. Nanjundan, J. Zou, A. Du and C. Yu, Thermal Reductive Perforation of Graphene Cathode for High-Performance Aluminum-Ion Batteries, *Advanced Functional Materials*, 2021, **31**, 2010569.
10. J. Li, W. Liu, Z. Yu, J. Deng, S. Zhong, Q. Xiao, F. chen and D. Yan, N-doped C@ZnSe as a low cost positive electrode for aluminum-ion batteries: Better electrochemical performance with high voltage platform of ~1.8 V and new reaction mechanism, *Electrochimica Acta*, 2021, **370**, 137790.
11. C. Liu, Z. Liu, Q. Li, H. Niu, C. Wang, Z. Wang and B. Gao, Binder-free ultrasonicated graphite flakes@carbon fiber cloth cathode for rechargeable aluminum-ion battery, *Journal of Power Sources*, 2019, **438**, 226950.
12. H. Hu, T. Cai, P. Bai, J. Xu, S. Ge, H. Hu, M. Wu, Q. Xue, Z. Yan, X. Gao and W. Xing, Small graphite nanoflakes as an advanced cathode material for aluminum ion batteries, *Chemical Communications*, 2020, **56**, 1593-1596.
13. E. Zhang, J. Wang, B. Wang, X. Yu, H. Yang and B. Lu, Unzipped carbon nanotubes for aluminum battery, *Energy Storage Materials*, 2019, **23**, 72-78.
14. A. S. Childress, P. Parajuli, J. Zhu, R. Podila and A. M. Rao, A Raman spectroscopic study of graphene cathodes in high-performance aluminum ion batteries, *Nano Energy*, 2017, **39**, 69-76.
15. Z. Liu, J. Wang, X. Jia, W. Li, Q. Zhang, L. Fan, H. Ding, H. Yang, X. Yu, X. Li and B. Lu, Graphene Armored with a Crystal Carbon Shell for Ultrahigh-Performance Potassium Ion Batteries and Aluminum Batteries, *ACS Nano*, 2019, **13**, 10631-10642.

16. M.-C. Lin, M. Gong, B. Lu, Y. Wu, D.-Y. Wang, M. Guan, M. Angell, C. Chen, J. Yang, B.-J. Hwang and H. Dai, An ultrafast rechargeable aluminium-ion battery, *Nature*, 2015, **520**, 324.
17. Y. Hu, B. Luo, D. Ye, X. Zhu, M. Lyu and L. Wang, An Innovative Freeze-Dried Reduced Graphene Oxide Supported SnS<sub>2</sub> Cathode Active Material for Aluminum-Ion Batteries, *Advanced Materials*, 2017, **29**, 1606132.
18. C. Li, S. Dong, R. Tang, X. Ge, Z. Zhang, C. Wang, Y. Lu and L. Yin, Heteroatomic interface engineering in MOF-derived carbon heterostructures with built-in electric-field effects for high performance Al-ion batteries, *Energy & Environmental Science*, 2018, **11**, 3201-3211.
19. T. Cai, L. Zhao, H. Hu, T. Li, X. Li, S. Guo, Y. Li, Q. Xue, W. Xing, Z. Yan and L. Wang, Stable CoSe<sub>2</sub>/carbon nanodice@reduced graphene oxide composites for high-performance rechargeable aluminum-ion batteries, *Energy & Environmental Science*, 2018, **11**, 2341-2347.
20. C. Li, S. Dong, P. Wang, C. Wang and L. Yin, Metal–Organic Frameworks-Derived Tunnel Structured Co<sub>3</sub>(PO<sub>4</sub>)<sub>2</sub>@C as Cathode for New Generation High-Performance Al-Ion Batteries, *Advanced Energy Materials*, 2019, **9**, 1902352.
21. H. Li, H. Yang, Z. Sun, Y. Shi, H.-M. Cheng and F. Li, A highly reversible Co<sub>3</sub>S<sub>4</sub> microsphere cathode material for aluminum-ion batteries, *Nano Energy*, 2019, **56**, 100-108.
22. W. Xing, D. Du, T. Cai, X. Li, J. Zhou, Y. Chai, Q. Xue and Z. Yan, Carbon-encapsulated CoSe nanoparticles derived from metal-organic frameworks as advanced cathode material for Al-ion battery, *Journal of Power Sources*, 2018, **401**, 6-12.
23. X. Zhang, G. Zhang, S. Wang, S. Li and S. Jiao, Porous CuO microsphere architectures as high-performance cathode materials for aluminum-ion batteries, *Journal of Materials Chemistry A*, 2018, **6**, 3084-3090.
24. S. Wang, Z. Yu, J. Tu, J. Wang, D. Tian, Y. Liu and S. Jiao, A Novel Aluminum-Ion Battery: Al/AlCl<sub>3</sub>-[EMIm]Cl/Ni<sub>3</sub>S<sub>2</sub>@Graphene, *Advanced Energy Materials*, 2016, **6**, 1600137.
25. S. Wang, S. Jiao, J. Wang, H.-S. Chen, D. Tian, H. Lei and D.-N. Fang, High-Performance Aluminum-Ion Battery with CuS@C Microsphere Composite Cathode, *ACS Nano*, 2017, **11**, 469-477.
26. W. Xing, X. Li, T. Cai, Y. Zhang, P. Bai, J. Xu, H. Hu, M. Wu, Q. Xue, Y. Zhao, J. Zhou, S. Zhuo, X. Gao and Z. Yan, Layered double hydroxides derived NiCo-sulfide as a cathode material for aluminum ion batteries, *Electrochimica Acta*, 2020, **344**, 136174.
27. G. Li, J. Tu, M. Wang and S. Jiao, Cu<sub>3</sub>P as a novel cathode material for rechargeable aluminum-ion batteries, *Journal of Materials Chemistry A*, 2019, **7**, 8368-8375.
28. A. VahidMohammadi, A. Hadjikhani, S. Shahbazmohamadi and M. Beidaghi, Two-Dimensional Vanadium Carbide (MXene) as a High-Capacity Cathode Material for Rechargeable Aluminum Batteries, *ACS Nano*, 2017, **11**, 11135-11144.
29. S. Lu, M. Wang, F. Guo, J. Tu, A. Lv, Y. Chen and S. Jiao, Self-supporting and high-loading hierarchically porous Co-P cathode for advanced Al-ion battery, *Chemical Engineering Journal*, 2020, **389**, 124370.
30. X. F. Zhang, S. Wang, J. G. Tu, G. H. Zhang, S. J. Li, D. H. Tian and S. Q. Jiao, Flower-like Vanadium Sulfide/Reduced Graphene Oxide Composite: An Energy Storage Material for Aluminum-Ion Batteries, *ChemSusChem*, 2018, **11**, 709-715.
